# Supplementary material for: Hypoxia and Inactivity Related Physiological Changes (Constipation, Inflammation) Are Not Reflected at the Level of Gut Metabolites and Butyrate Producing Microbial Community: The PlanHab Study
Source: Front Physiol. 2017 May 4;8:250. doi: 10.3389/fphys.2017.00250 (PMC5416748; doi:10.3389/fphys.2017.00250)
Supplement: Supplementary file 1 [file DataSheet1.XLSX]

## Sheet: List1
buk	Taxa_S	Individuals	Dominance_D	Simpson_1-D	Shannon_H	Evenness_e^H/S	Brillouin	Menhinick	Margalef	Equitability_J	Fisher_alpha	Berger-Parker	Chao-1
S1	693	6829	0.16	0.84	3.802	0.06461	3.656	8.386	78.38	0.5812	192.7	0.3819	995.1
Lower	1227	6829	0.05323	0.9411	4.472	0.07037	4.25	14.85	138.9	0.6278	436.2	0.1432	1903
Upper	1309	6829	0.05886	0.9468	4.609	0.07772	4.375	15.84	148.1	0.6431	481.1	0.1615	2220
S2	744	6829	0.1329	0.8671	3.873	0.06465	3.721	9.003	84.16	0.5858	212.5	0.3375	1031
Lower	1229	6829	0.05325	0.9412	4.476	0.07012	4.253	14.87	139.1	0.6277	437.3	0.1442	1898
Upper	1308	6829	0.05877	0.9467	4.608	0.07778	4.376	15.83	148	0.6434	480.5	0.1611	2232
S3	753	6829	0.1178	0.8822	3.768	0.05748	3.616	9.112	85.17	0.5688	216.1	0.2861	996.3
Lower	1228	6829	0.05359	0.9414	4.472	0.07026	4.251	14.86	139	0.6276	436.8	0.1447	1906
Upper	1306	6829	0.05858	0.9464	4.606	0.07779	4.373	15.8	147.8	0.6432	479.4	0.1606	2221
S4	705	6829	0.1084	0.8916	3.82	0.06467	3.676	8.531	79.74	0.5824	197.3	0.2539	1059
Lower	1228	6829	0.05332	0.941	4.47	0.07016	4.248	14.86	139	0.6273	436.8	0.1439	1891
Upper	1310	6829	0.05897	0.9467	4.609	0.07803	4.376	15.85	148.3	0.6435	481.6	0.1614	2234
S5	829	6829	0.1196	0.8804	3.839	0.05605	3.675	10.03	93.78	0.5712	247.1	0.2978	1153
Lower	1230	6829	0.05336	0.9413	4.476	0.07006	4.253	14.88	139.2	0.6279	437.8	0.1447	1905
Upper	1311	6829	0.05865	0.9466	4.61	0.07794	4.378	15.86	148.4	0.6436	482.2	0.1609	2227
S6	790	6829	0.1066	0.8934	3.912	0.06327	3.753	9.56	89.37	0.5863	231	0.2623	1027
Lower	1228	6829	0.0536	0.9413	4.474	0.07025	4.253	14.86	139	0.6278	436.8	0.1441	1903
Upper	1310	6829	0.05872	0.9464	4.606	0.07773	4.373	15.85	148.3	0.643	481.6	0.1606	2233
S7	573	6829	0.2684	0.7316	3.153	0.04085	3.029	6.934	64.79	0.4965	149	0.5017	752.2
Lower	1229	6829	0.0533	0.9412	4.475	0.07039	4.253	14.87	139.1	0.6279	437.3	0.1437	1900
Upper	1305	6829	0.05882	0.9467	4.614	0.07796	4.381	15.79	147.7	0.6436	478.8	0.1615	2207
S8	532	6829	0.2642	0.7358	3.15	0.04386	3.033	6.438	60.14	0.5018	134.9	0.5014	646.4
Lower	1228	6829	0.05331	0.9412	4.479	0.07042	4.256	14.86	139	0.6285	436.8	0.1441	1902
Upper	1307	6829	0.05878	0.9467	4.611	0.07796	4.377	15.82	147.9	0.6435	480	0.1611	2225
S9	634	6829	0.1854	0.8146	3.474	0.05091	3.337	7.672	71.7	0.5385	170.7	0.3557	760
Lower	1229	6829	0.05346	0.9412	4.47	0.07024	4.248	14.87	139.1	0.6276	437.3	0.1435	1895
Upper	1310	6829	0.05882	0.9465	4.609	0.07775	4.376	15.85	148.3	0.643	481.6	0.1617	2228
S10	691	6829	0.1664	0.8336	3.634	0.05479	3.488	8.362	78.15	0.5558	192	0.358	885.3
Lower	1227	6829	0.05338	0.9414	4.478	0.07062	4.256	14.85	138.9	0.6282	436.2	0.1439	1894
Upper	1309	6829	0.0586	0.9466	4.607	0.07761	4.375	15.84	148.1	0.6428	481.1	0.1609	2229
S11	647	6829	0.2499	0.7501	3.303	0.04203	3.17	7.829	73.17	0.5103	175.5	0.4919	1030
Lower	1229	6829	0.05318	0.9413	4.479	0.07047	4.257	14.87	139.1	0.6283	437.3	0.1444	1900
Upper	1312	6829	0.05866	0.9468	4.612	0.07816	4.378	15.88	148.5	0.6441	482.8	0.1603	2230
S12	577	6829	0.1675	0.8325	3.58	0.06219	3.452	6.982	65.24	0.5631	150.3	0.3835	643
Lower	1230	6829	0.05327	0.9412	4.478	0.07015	4.254	14.88	139.2	0.6279	437.8	0.1439	1911
Upper	1312	6829	0.05871	0.9467	4.61	0.07797	4.378	15.88	148.5	0.6435	482.8	0.1606	2220
S13	751	6829	0.138	0.862	3.82	0.06075	3.665	9.088	84.95	0.577	215.3	0.3328	969.3
Lower	1227	6829	0.05319	0.9413	4.473	0.07048	4.251	14.85	138.9	0.6282	436.2	0.1437	1893
Upper	1309	6829	0.05865	0.9468	4.609	0.07824	4.378	15.84	148.1	0.6438	481.1	0.1608	2213
S14	467	6829	0.1881	0.8119	3.261	0.05581	3.152	5.651	52.78	0.5305	113.5	0.3113	529.1
Lower	1227	6829	0.05354	0.9413	4.475	0.07039	4.252	14.85	138.9	0.6279	436.2	0.1447	1907
Upper	1306	6829	0.05868	0.9465	4.605	0.07758	4.372	15.8	147.8	0.6426	479.4	0.1606	2215
S15	429	6829	0.2097	0.7903	3.273	0.06149	3.17	5.191	48.48	0.5399	101.6	0.4314	522.1
Lower	1231	6829	0.05346	0.9412	4.475	0.07043	4.252	14.9	139.3	0.6279	438.4	0.1437	1900
Upper	1304	6829	0.05876	0.9465	4.605	0.07783	4.374	15.78	147.6	0.643	478.3	0.1611	2223
S16	395	6829	0.282	0.718	2.881	0.04515	2.788	4.78	44.63	0.4819	91.25	0.514	440.2
Lower	1229	6829	0.05335	0.9412	4.47	0.07029	4.25	14.87	139.1	0.6275	437.3	0.1438	1901
Upper	1308	6829	0.05874	0.9466	4.607	0.07809	4.376	15.83	148	0.6436	480.5	0.1608	2218
S17	430	6829	0.2105	0.7895	3.116	0.05248	3.015	5.203	48.59	0.5139	101.9	0.3801	500.9
Lower	1228	6829	0.05346	0.9413	4.47	0.07026	4.248	14.86	139	0.6275	436.8	0.1439	1907
Upper	1308	6829	0.05865	0.9465	4.609	0.0778	4.376	15.83	148	0.6432	480.5	0.1605	2226
S18	450	6829	0.254	0.746	2.937	0.04192	2.839	5.445	50.86	0.4808	108.1	0.4784	584.1
Lower	1233	6829	0.05337	0.9412	4.474	0.07017	4.251	14.92	139.5	0.6275	439.5	0.1439	1910
Upper	1308	6829	0.05871	0.9466	4.611	0.07799	4.378	15.83	148	0.6434	480.5	0.1615	2234
S19	660	6829	0.1842	0.8158	3.412	0.04593	3.274	7.987	74.64	0.5255	180.3	0.3907	829.4
Lower	1227	6829	0.05331	0.9411	4.474	0.0703	4.25	14.85	138.9	0.6276	436.2	0.1439	1893
Upper	1308	6829	0.05891	0.9466	4.606	0.07783	4.374	15.83	148	0.6433	480.5	0.1614	2214
S20	645	6829	0.1915	0.8085	3.402	0.04657	3.267	7.805	72.94	0.5259	174.8	0.4012	825.6
Lower	1229	6829	0.05333	0.9411	4.473	0.07015	4.25	14.87	139.1	0.6275	437.3	0.1442	1900
Upper	1310	6829	0.05891	0.9467	4.611	0.07787	4.378	15.85	148.3	0.6435	481.6	0.1608	2216
S21	689	6829	0.1851	0.8149	3.522	0.04913	3.38	8.338	77.93	0.5389	191.2	0.4065	938.6
Lower	1228	6829	0.05358	0.9415	4.479	0.07042	4.257	14.86	139	0.6284	436.8	0.1442	1907
Upper	1307	6829	0.05846	0.9464	4.608	0.0778	4.374	15.82	147.9	0.643	480	0.1608	2225
S22	578	6829	0.2481	0.7519	3.226	0.04358	3.104	6.994	65.35	0.5073	150.7	0.4857	783.4
Lower	1232	6829	0.05345	0.9412	4.476	0.07019	4.253	14.91	139.4	0.6281	438.9	0.1442	1905
Upper	1308	6829	0.05883	0.9465	4.608	0.07745	4.374	15.83	148	0.6428	480.5	0.1606	2215
S23	686	6829	0.1645	0.8355	3.602	0.05344	3.459	8.301	77.59	0.5515	190.1	0.3738	919.8
Lower	1231	6829	0.05319	0.9413	4.478	0.07034	4.255	14.9	139.3	0.6279	438.4	0.1444	1900
Upper	1311	6829	0.05865	0.9468	4.616	0.07801	4.382	15.86	148.4	0.644	482.2	0.1608	2232
S24	640	6829	0.2134	0.7866	3.435	0.04848	3.301	7.745	72.38	0.5316	172.9	0.4465	910.7
Lower	1226	6829	0.05327	0.9412	4.474	0.07025	4.253	14.84	138.7	0.6279	435.7	0.1438	1892
Upper	1308	6829	0.05883	0.9467	4.607	0.07817	4.374	15.83	148	0.6436	480.5	0.1609	2215
S25	813	6829	0.1007	0.8993	3.902	0.0609	3.739	9.838	91.97	0.5823	240.5	0.2358	1093
Lower	1230	6829	0.05334	0.9415	4.48	0.07051	4.257	14.88	139.2	0.6288	437.8	0.1437	1904
Upper	1309	6829	0.05852	0.9467	4.613	0.07792	4.38	15.84	148.1	0.6435	481.1	0.1605	2212
S26	786	6829	0.106	0.894	3.792	0.05641	3.634	9.511	88.91	0.5687	229.4	0.2358	972.5
Lower	1230	6829	0.05334	0.9413	4.475	0.07073	4.253	14.88	139.2	0.6284	437.8	0.1435	1906
Upper	1310	6829	0.05864	0.9466	4.611	0.07801	4.378	15.85	148.3	0.6438	481.6	0.1605	2219
S27	750	6829	0.1009	0.8991	3.727	0.05538	3.577	9.076	84.83	0.5629	214.9	0.2043	983.6
Lower	1227	6829	0.05336	0.9412	4.471	0.07025	4.251	14.85	138.9	0.6276	436.2	0.1444	1900
Upper	1307	6829	0.05876	0.9466	4.61	0.07776	4.376	15.82	147.9	0.6431	480	0.1608	2221
S28	704	6829	0.1176	0.8824	3.665	0.05548	3.521	8.519	79.62	0.559	197	0.2533	884.4
Lower	1228	6829	0.05339	0.9413	4.471	0.07034	4.249	14.86	139	0.6276	436.8	0.1438	1892
Upper	1309	6829	0.05869	0.9465	4.606	0.07801	4.373	15.84	148.1	0.6431	481.1	0.1611	2235
S29	674	6829	0.1966	0.8034	3.438	0.04618	3.298	8.156	76.23	0.5278	185.6	0.4144	852.7
Lower	1231	6829	0.05303	0.9412	4.478	0.07024	4.254	14.9	139.3	0.6277	438.4	0.1437	1908
Upper	1308	6829	0.05876	0.9469	4.613	0.07813	4.379	15.83	148	0.6438	480.5	0.1612	2209
S30	739	6829	0.1547	0.8453	3.636	0.05133	3.487	8.943	83.59	0.5504	210.6	0.3654	989.6
Lower	1228	6829	0.05321	0.9412	4.473	0.07017	4.251	14.86	139	0.6277	436.8	0.1432	1907
Upper	1310	6829	0.05884	0.9468	4.612	0.07808	4.38	15.85	148.3	0.6439	481.6	0.1608	2219
S31	825	6829	0.1294	0.8706	3.808	0.0546	3.643	9.983	93.33	0.567	245.5	0.2936	1164
Lower	1229	6829	0.05354	0.9412	4.476	0.07023	4.253	14.87	139.1	0.628	437.3	0.1448	1901
Upper	1307	6829	0.0588	0.9465	4.614	0.07782	4.38	15.82	147.9	0.6438	480	0.1618	2236
S32	776	6829	0.1336	0.8664	3.6	0.04716	3.446	9.39	87.78	0.541	225.3	0.2895	971.6
Lower	1229	6829	0.05336	0.9413	4.478	0.07051	4.255	14.87	139.1	0.6283	437.3	0.1442	1894
Upper	1306	6829	0.05862	0.9466	4.606	0.0777	4.374	15.8	147.8	0.6432	479.4	0.1606	2223
S33	687	6829	0.1403	0.8597	3.533	0.04984	3.395	8.313	77.7	0.5409	190.5	0.3	958.1
Lower	1230	6829	0.05333	0.9411	4.474	0.07032	4.252	14.88	139.2	0.628	437.8	0.1447	1902
Upper	1308	6829	0.05882	0.9467	4.605	0.07763	4.374	15.83	148	0.643	480.5	0.1611	2208
S34	686	6829	0.1402	0.8598	3.488	0.04768	3.35	8.301	77.59	0.534	190.1	0.3062	979.6
Lower	1228	6829	0.05338	0.9411	4.472	0.07031	4.251	14.86	139	0.6276	436.8	0.1447	1908
Upper	1308	6829	0.05887	0.9466	4.608	0.07763	4.374	15.83	148	0.6429	480.5	0.1612	2223
S36	732	6829	0.1628	0.8372	3.528	0.04653	3.379	8.858	82.8	0.5349	207.8	0.3268	977.9
Lower	1226	6829	0.05327	0.9411	4.472	0.06998	4.25	14.84	138.7	0.6273	435.7	0.1445	1902
Upper	1308	6829	0.05889	0.9467	4.611	0.07782	4.377	15.83	148	0.6435	480.5	0.1612	2213
S37	682	6829	0.2081	0.7919	3.414	0.04455	3.273	8.253	77.13	0.5232	188.6	0.4343	929.1
Lower	1227	6829	0.05337	0.9413	4.476	0.07036	4.254	14.85	138.9	0.6277	436.2	0.1445	1910
Upper	1304	6829	0.0587	0.9466	4.607	0.07763	4.376	15.78	147.6	0.6433	478.3	0.1609	2219
S39	698	6829	0.1445	0.8555	3.549	0.04981	3.405	8.447	78.94	0.5419	194.7	0.3156	847.6
Lower	1227	6829	0.05337	0.9411	4.473	0.07003	4.251	14.85	138.9	0.6274	436.2	0.1439	1901
Upper	1307	6829	0.05886	0.9466	4.607	0.0777	4.375	15.82	147.9	0.6432	480	0.1611	2226
S40	788	6829	0.1536	0.8464	3.593	0.0461	3.437	9.536	89.14	0.5387	230.2	0.35	1086
Lower	1227	6829	0.05328	0.9412	4.471	0.07025	4.249	14.85	138.9	0.6278	436.2	0.1439	1905
Upper	1306	6829	0.05877	0.9467	4.608	0.07778	4.375	15.8	147.8	0.6432	479.4	0.1612	2214
S41	896	6829	0.09277	0.9072	4.006	0.06132	3.83	10.84	101.4	0.5893	275.8	0.2011	1170
Lower	1227	6829	0.05309	0.9412	4.474	0.07031	4.253	14.85	138.9	0.6278	436.2	0.1435	1900
Upper	1307	6829	0.05877	0.9469	4.61	0.07798	4.377	15.82	147.9	0.6435	480	0.1611	2228
S42	584	6829	0.1536	0.8464	3.472	0.05513	3.347	7.067	66.03	0.545	152.8	0.3422	735.2
Lower	1230	6829	0.0533	0.9412	4.474	0.07025	4.253	14.88	139.2	0.6274	437.8	0.1445	1897
Upper	1308	6829	0.05881	0.9467	4.61	0.07776	4.377	15.83	148	0.6431	480.5	0.1615	2215
S43	988	6829	0.0955	0.9045	4.204	0.06777	4.013	11.96	111.8	0.6097	317.2	0.2491	1397
Lower	1230	6829	0.05344	0.9414	4.476	0.07027	4.253	14.88	139.2	0.6278	437.8	0.1435	1902
Upper	1306	6829	0.05858	0.9466	4.608	0.07795	4.376	15.8	147.8	0.6436	479.4	0.1608	2233
S44	1052	6829	0.06236	0.9376	4.462	0.0824	4.26	12.73	119	0.6413	347.4	0.1545	1453
Lower	1229	6829	0.05344	0.9412	4.472	0.07023	4.251	14.87	139.1	0.6276	437.3	0.1445	1891
Upper	1306	6829	0.05877	0.9466	4.61	0.07796	4.377	15.8	147.8	0.6434	479.4	0.1609	2226
S45	904	6829	0.1118	0.8882	4.046	0.06324	3.868	10.94	102.3	0.5944	279.3	0.2844	1216
Lower	1229	6829	0.05332	0.9414	4.476	0.07038	4.254	14.87	139.1	0.6282	437.3	0.1441	1904
Upper	1310	6829	0.05858	0.9467	4.609	0.07808	4.376	15.85	148.3	0.6434	481.6	0.1614	2225
S46	1052	6829	0.0728	0.9272	4.321	0.07152	4.12	12.73	119	0.6209	347.4	0.1665	1531
Lower	1229	6829	0.05335	0.9412	4.475	0.07012	4.253	14.87	139.1	0.6277	437.3	0.1442	1906
Upper	1306	6829	0.05878	0.9466	4.609	0.07784	4.376	15.8	147.8	0.6434	479.4	0.1609	2221
S47	934	6829	0.08667	0.9133	4.191	0.07076	4.009	11.3	105.7	0.6128	292.6	0.2336	1308
Lower	1227	6829	0.05309	0.9411	4.472	0.07014	4.249	14.85	138.9	0.6275	436.2	0.1438	1905
Upper	1309	6829	0.05884	0.9469	4.613	0.07814	4.381	15.84	148.1	0.6438	481.1	0.162	2217
S48	559	6829	0.2134	0.7866	3.223	0.04489	3.1	6.764	63.2	0.5094	144.1	0.4056	648.7
Lower	1228	6829	0.05324	0.9411	4.474	0.07013	4.252	14.86	139	0.6277	436.8	0.1442	1898
Upper	1311	6829	0.05884	0.9467	4.606	0.07769	4.375	15.86	148.4	0.6432	482.2	0.1609	2225
S49	557	6829	0.2359	0.7641	3.11	0.04024	2.991	6.74	62.97	0.4918	143.4	0.4548	684.2
Lower	1230	6829	0.05323	0.9411	4.476	0.07021	4.253	14.88	139.2	0.6278	437.8	0.1434	1906
Upper	1305	6829	0.05885	0.9467	4.607	0.07775	4.375	15.79	147.7	0.6433	478.8	0.1608	2223
S50	780	6829	0.09751	0.9025	3.91	0.06398	3.749	9.439	88.23	0.5872	226.9	0.2183	953.4
Lower	1230	6829	0.05333	0.9411	4.475	0.07023	4.252	14.88	139.2	0.6282	437.8	0.1447	1913
Upper	1307	6829	0.05886	0.9467	4.606	0.07772	4.374	15.82	147.9	0.6429	480	0.1602	2225
S51	609	6829	0.1474	0.8526	3.503	0.05455	3.371	7.37	68.86	0.5464	161.7	0.2858	733.9
Lower	1228	6829	0.05338	0.9413	4.473	0.07013	4.249	14.86	139	0.6275	436.8	0.1437	1890
Upper	1308	6829	0.05869	0.9466	4.603	0.07771	4.371	15.83	148	0.6427	480.5	0.1611	2225
S52	627	6829	0.1975	0.8025	3.34	0.04499	3.207	7.587	70.9	0.5185	168.2	0.4027	770.3
Lower	1227	6829	0.05333	0.9414	4.467	0.07027	4.246	14.85	138.9	0.6276	436.2	0.1441	1893
Upper	1309	6829	0.05862	0.9466	4.609	0.07798	4.377	15.84	148.1	0.6438	481.1	0.1608	2222
S53	752	6829	0.163	0.837	3.614	0.04937	3.462	9.1	85.06	0.5458	215.7	0.361	1031
Lower	1232	6829	0.05323	0.9413	4.473	0.07028	4.251	14.91	139.4	0.6277	438.9	0.1439	1906
Upper	1309	6829	0.05862	0.9467	4.612	0.07788	4.379	15.84	148.1	0.6436	481.1	0.1609	2230
S54	960	6829	0.1101	0.8899	3.915	0.05223	3.732	11.62	108.6	0.5701	304.3	0.2536	1420
Lower	1226	6829	0.05334	0.9414	4.475	0.07053	4.252	14.84	138.7	0.6281	435.7	0.1441	1905
Upper	1307	6829	0.0586	0.9466	4.61	0.07775	4.377	15.82	147.9	0.6434	480	0.1611	2221
